# Supplementary material
Source: PubMed Central journal article supplement (PMC9547947)

Fig 1A)

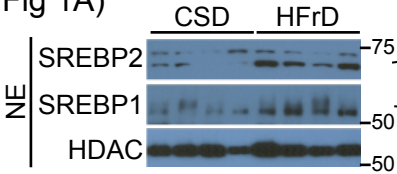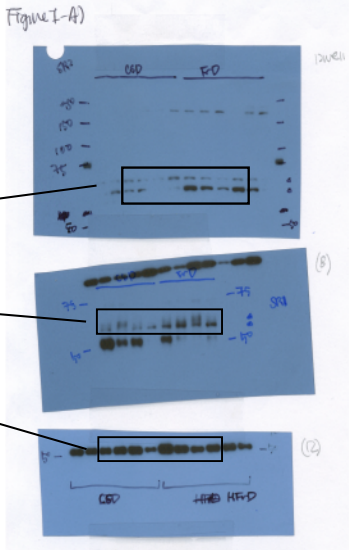

Figure I - B)

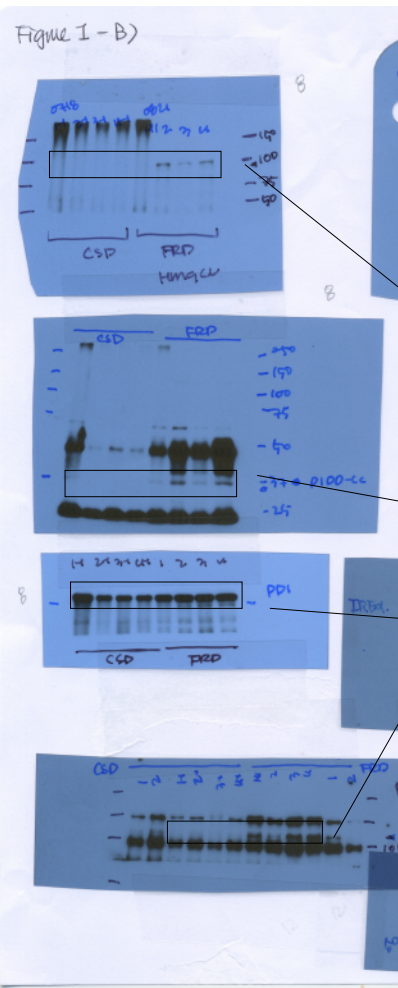

Fig 1B)

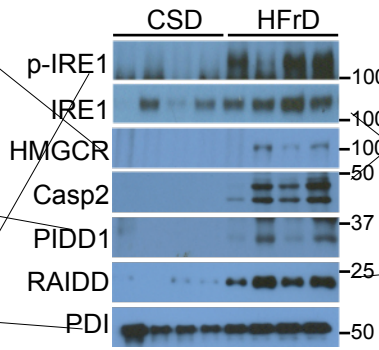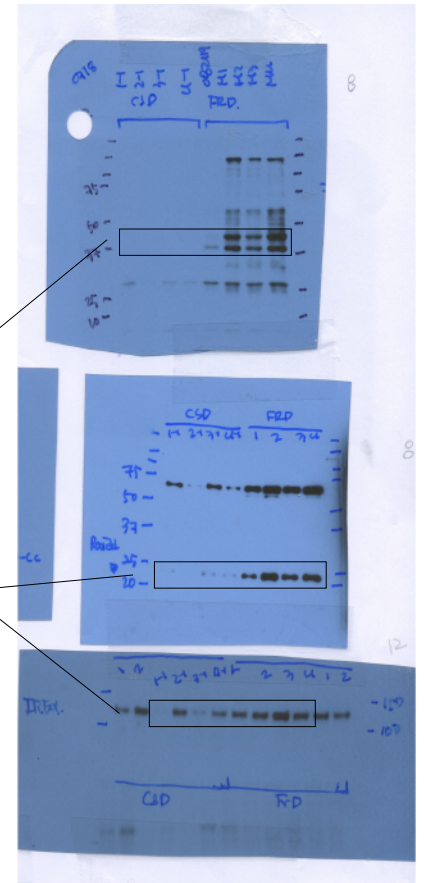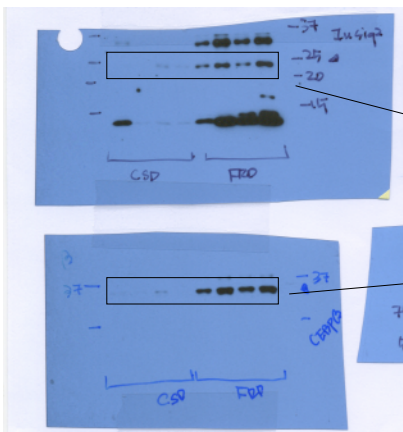

Fig 1C)

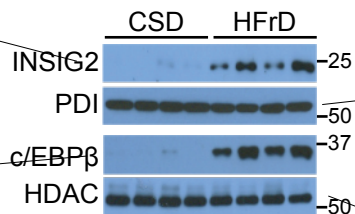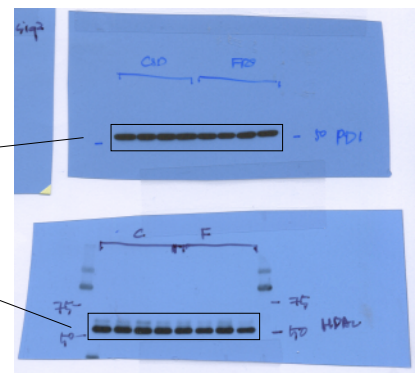

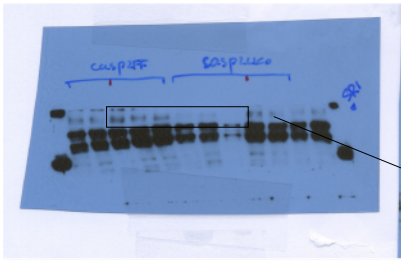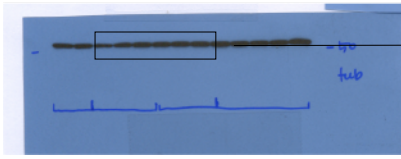

Fig 1E)

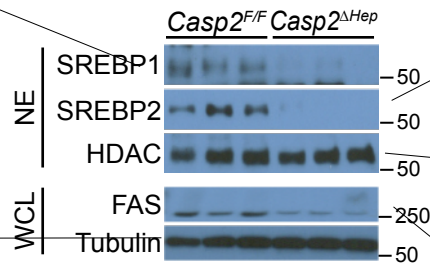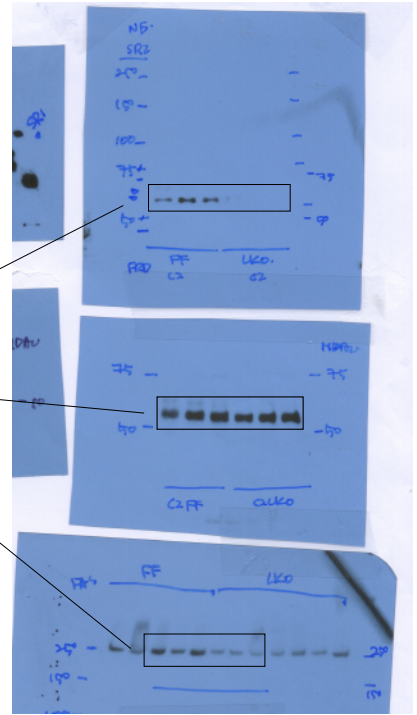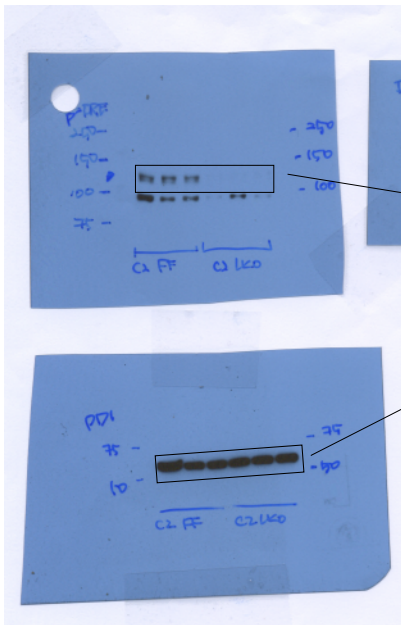

Fig 1F)

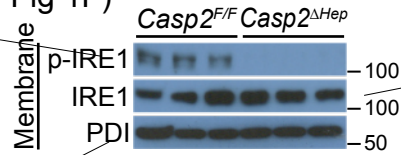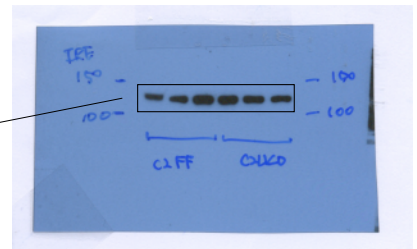

Fig 2C)

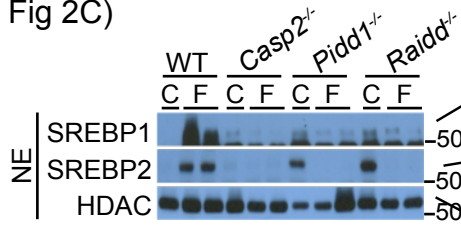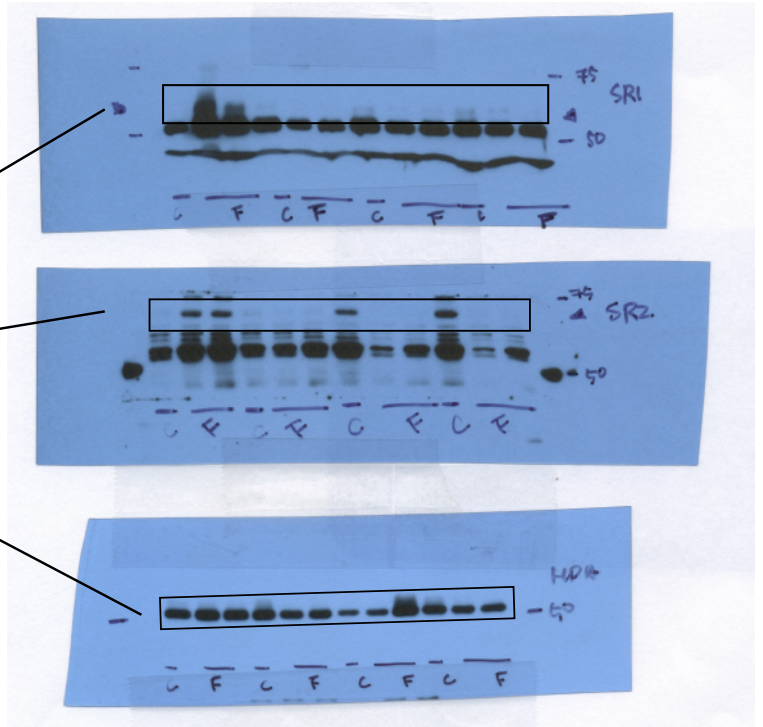

Figure 2-D

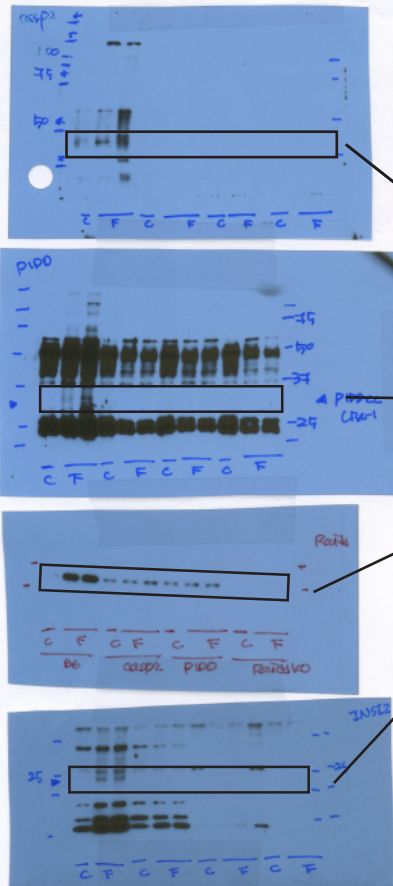

Fig 2D)

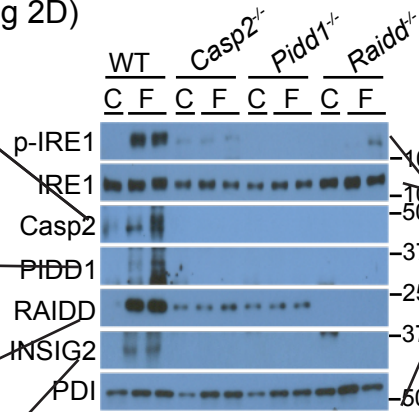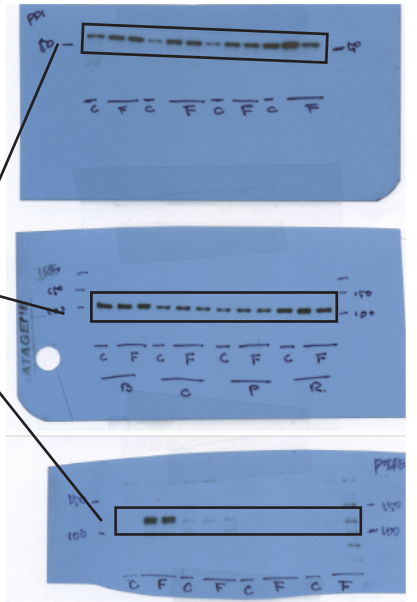

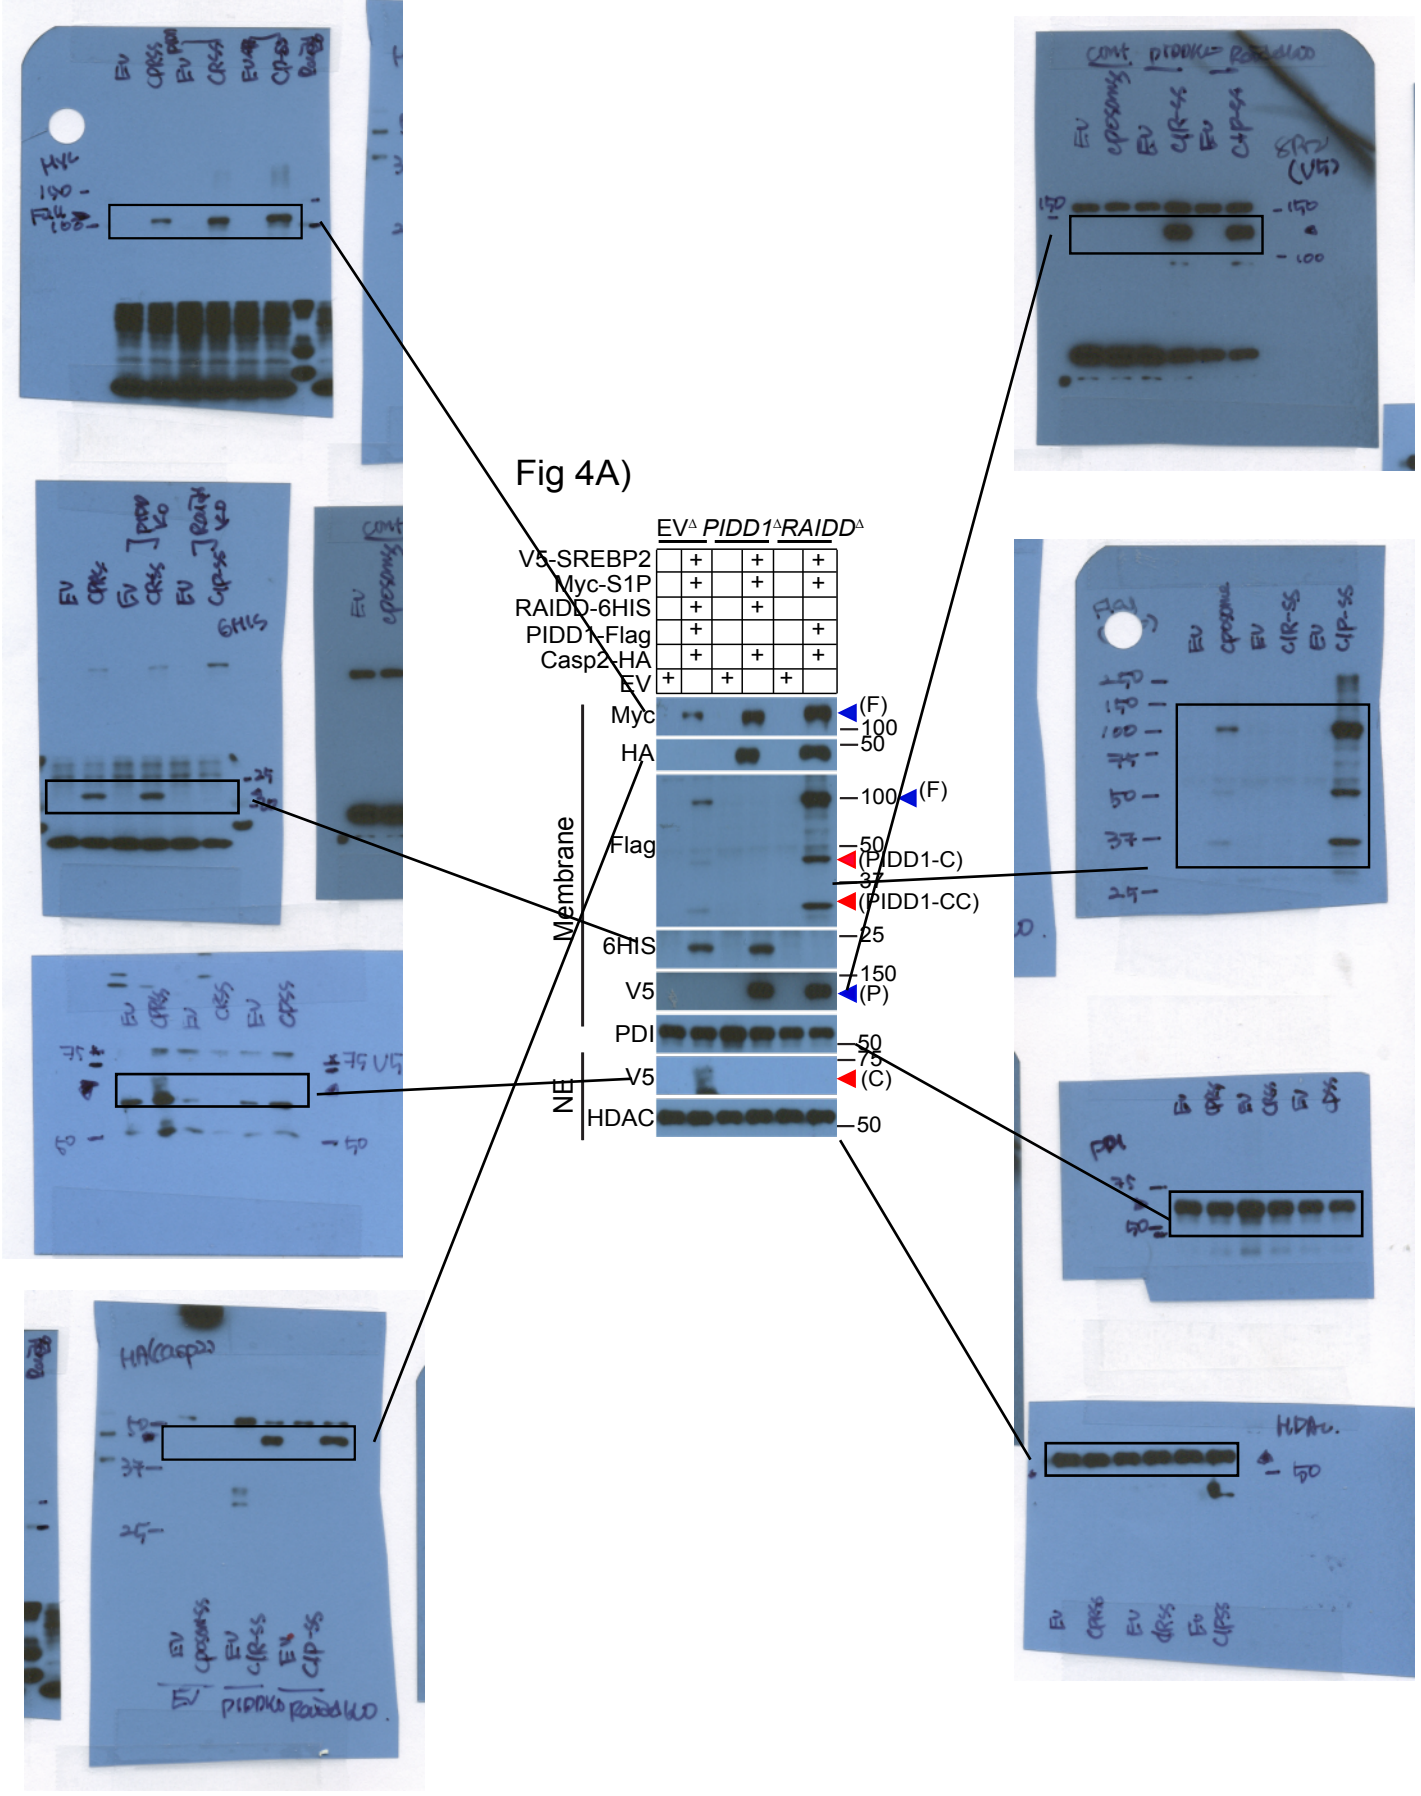

Fig 4B)

EV<sup>Δ</sup> PIDD1<sup>Δ</sup>

|            |   |   |    |
|------------|---|---|----|
| V5-SREBP2  | + | + | +  |
| Myc-S1P    | + | + | +  |
| RAIDD-6HIS | + | + | +  |
| PIDD1-Flag | + |   | ++ |
| Casp2-HA   | + | + | +  |
| EV         | + | + | +  |

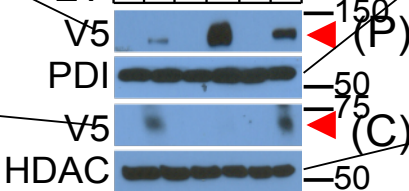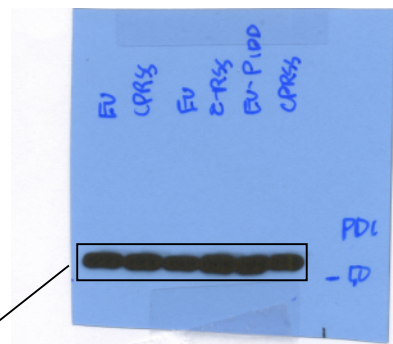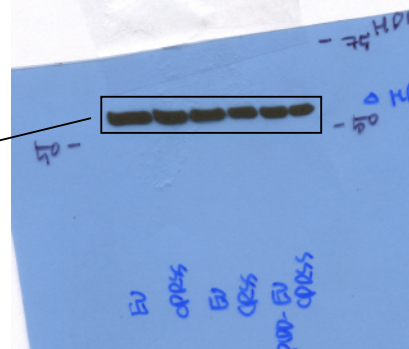

Fig 4C)

EV<sup>Δ</sup> RAIDD<sup>Δ</sup>

|            |   |   |    |
|------------|---|---|----|
| V5-SREBP2  | + | + | +  |
| Myc-S1P    | + | + | +  |
| RAIDD-6HIS | + |   | ++ |
| PIDD1-Flag | + | + | +  |
| Casp2-HA   | + | + | +  |
| EV         | + | + | +  |

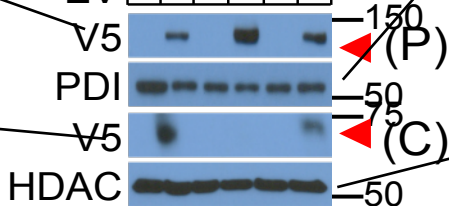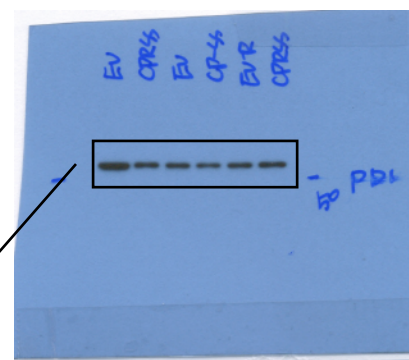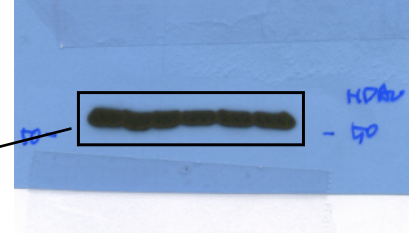

Fig 4D)

|            |   |   |   |   |  |   |   |
|------------|---|---|---|---|--|---|---|
| 25-HC      |   |   | + | + |  | + | + |
| GFP-SCAP   |   | + |   | + |  |   |   |
| V5-SREBP2  |   | + |   | + |  | + | + |
| Myc-S1P    |   | + |   | + |  | + | + |
| RAIDD-6HIS |   |   |   |   |  | + | + |
| PIDD1-Flag |   |   |   |   |  | + | + |
| Casp2-HA   |   |   |   |   |  | + | + |
| EV         | + | + | + | + |  |   |   |

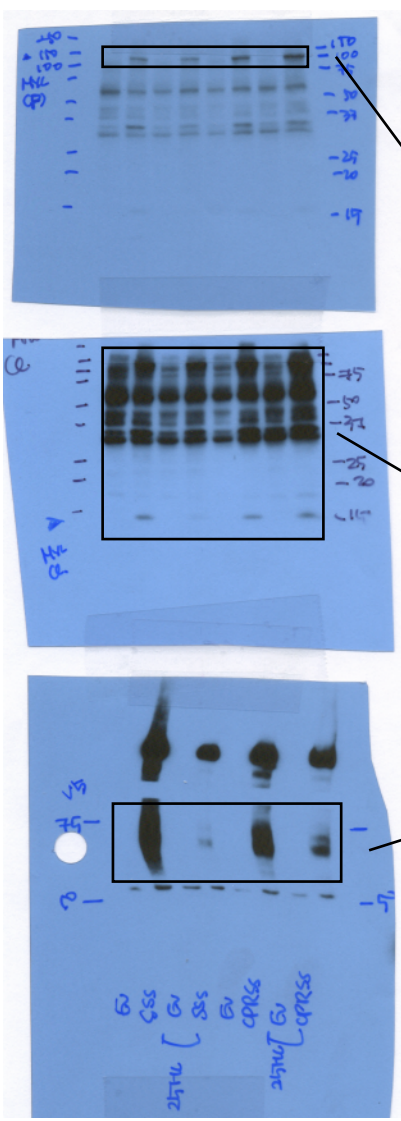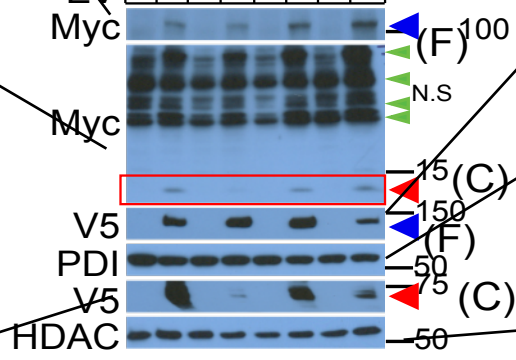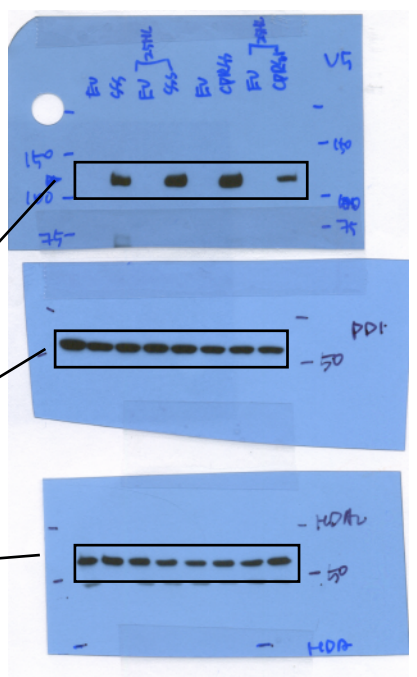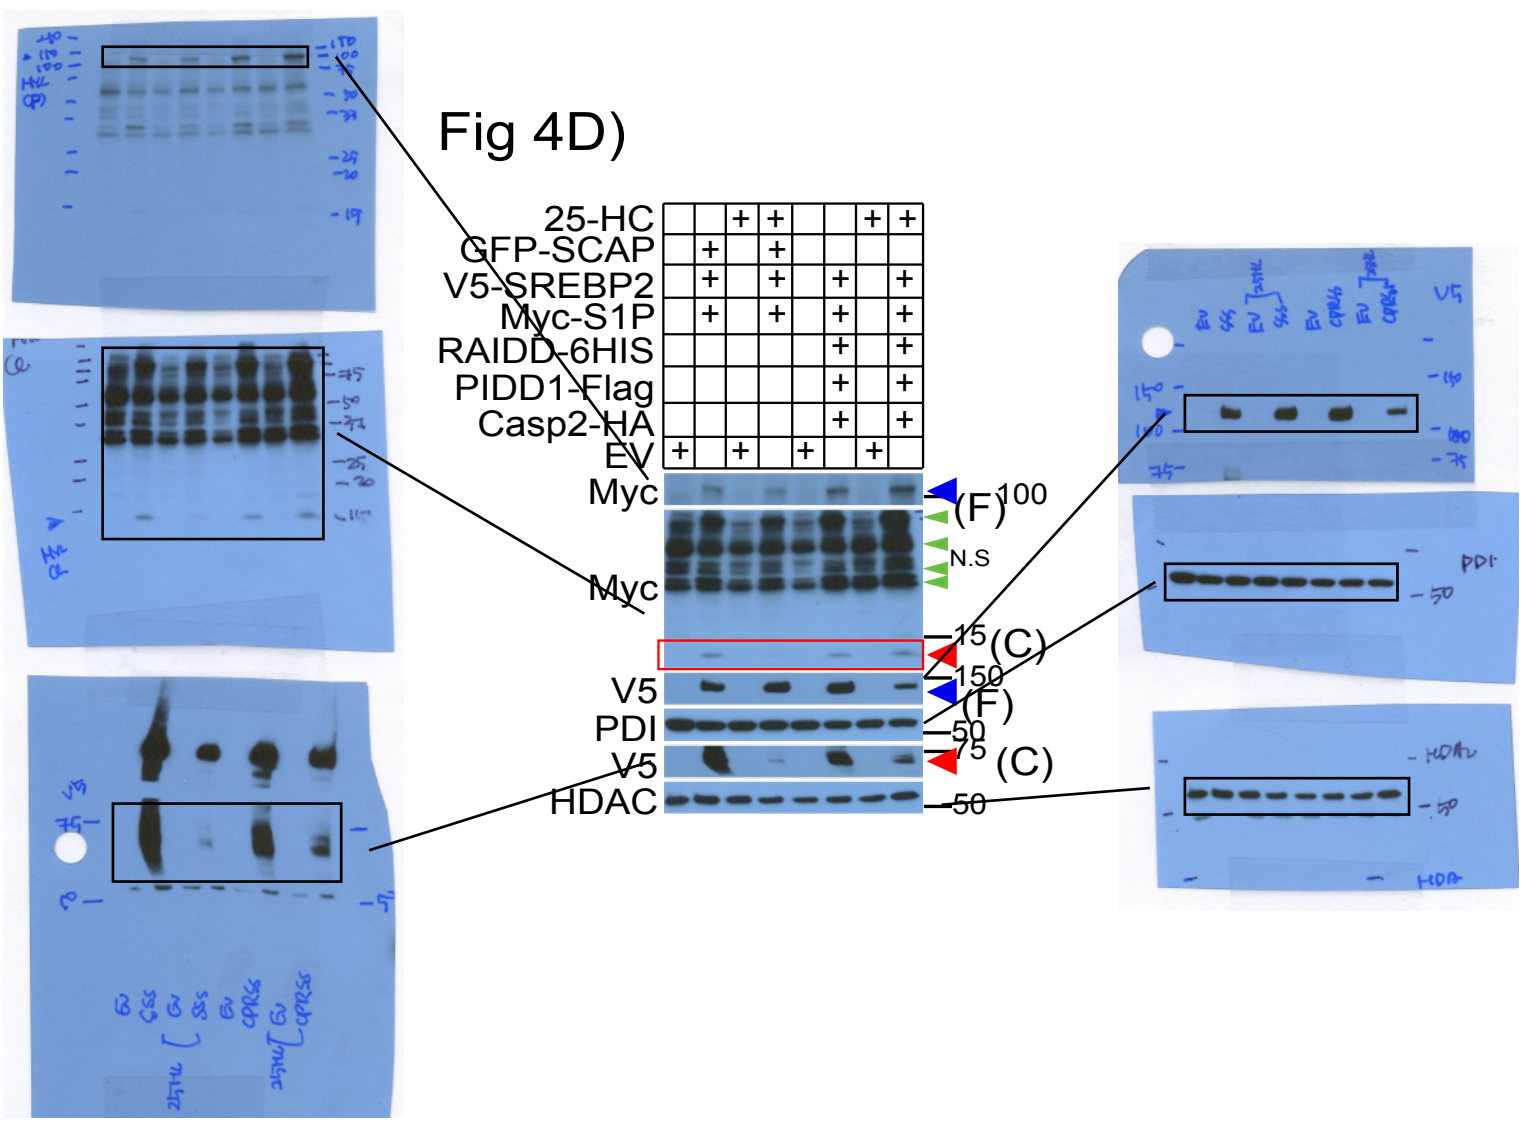

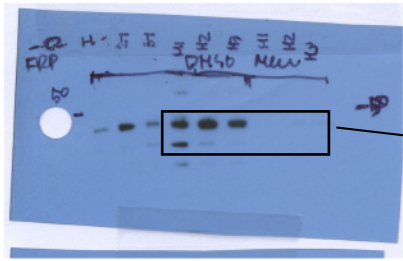

Fig 5B)

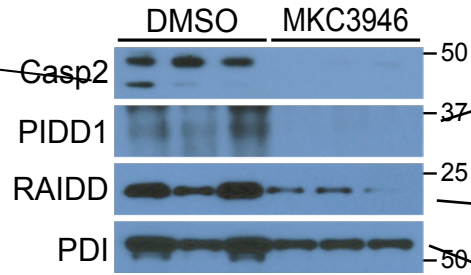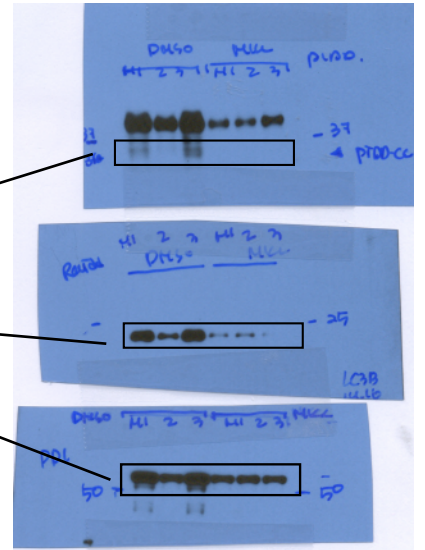



Fig 5C)

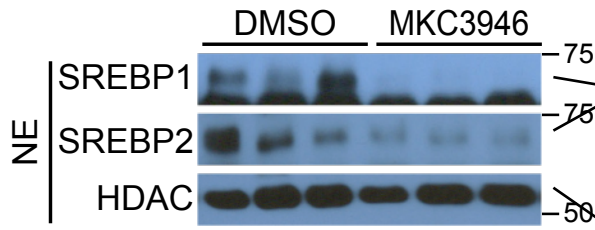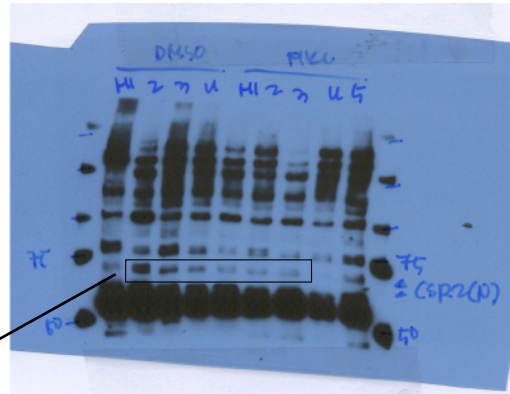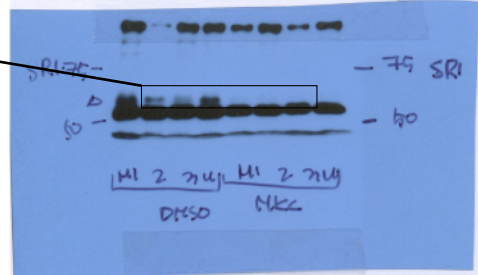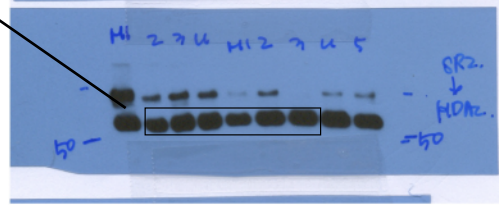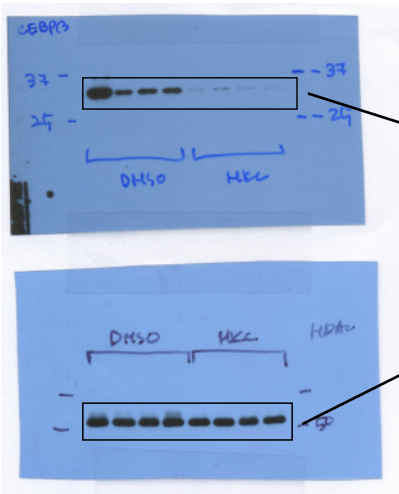

Fig 5E)

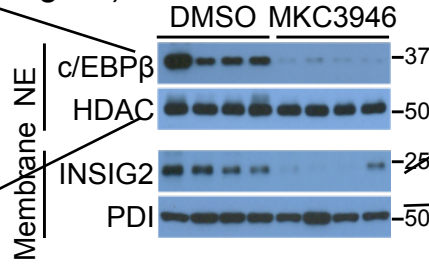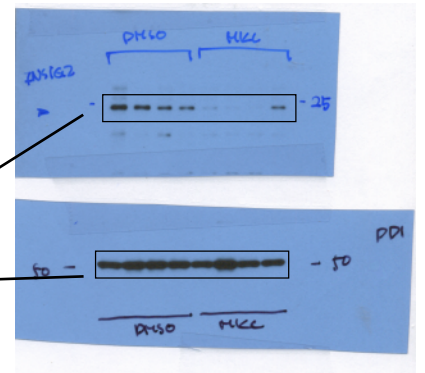

Fig 6A)

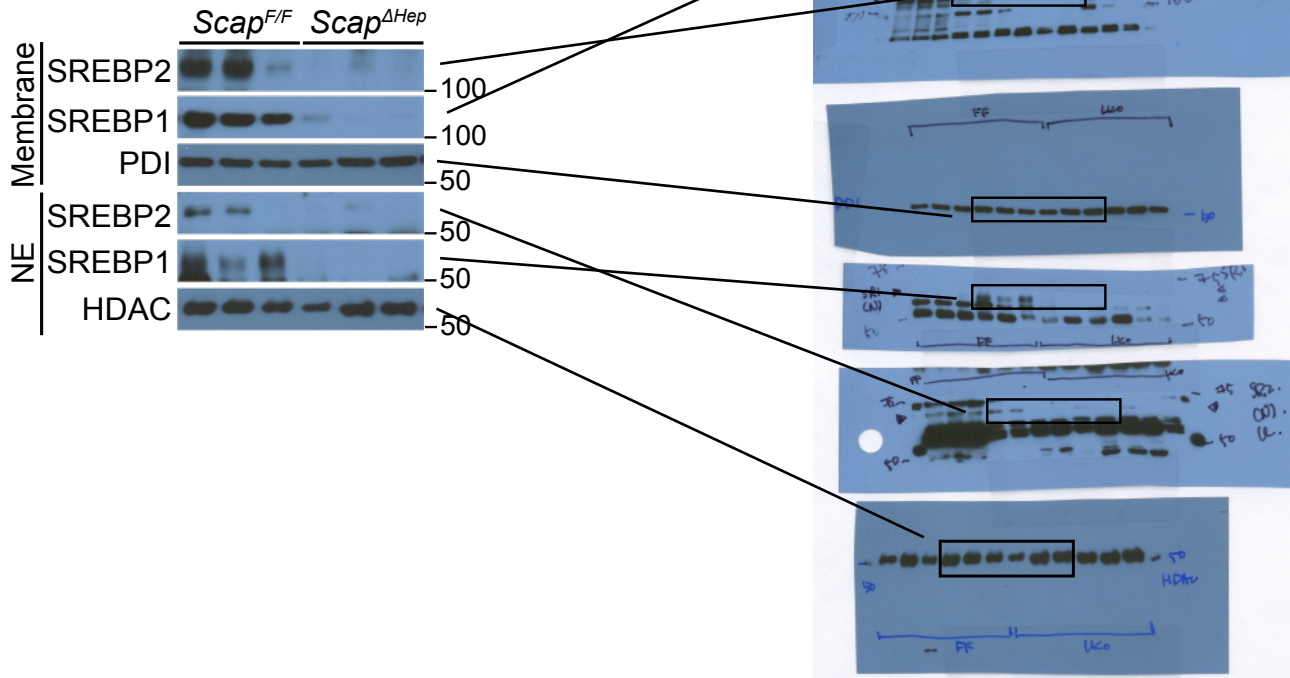

Fig 6D)

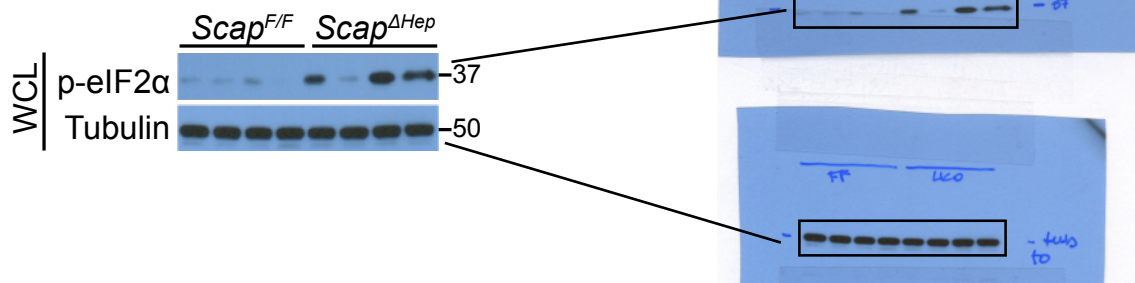

Fig 6C)

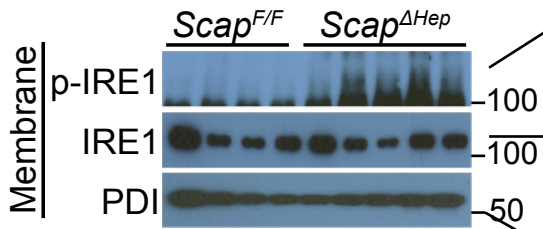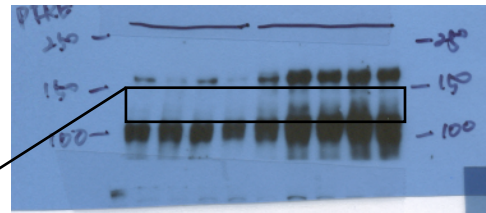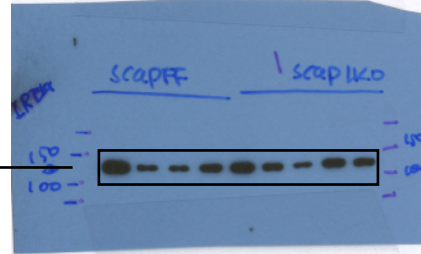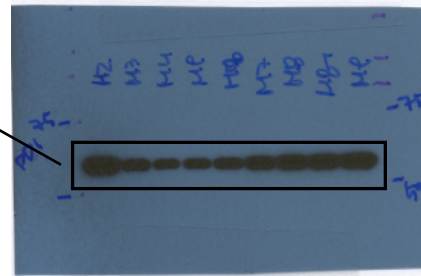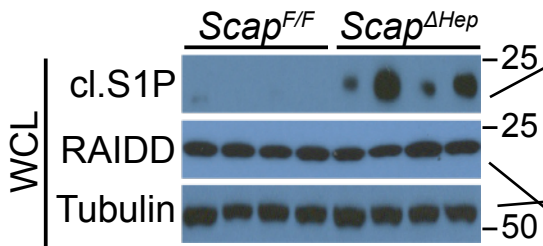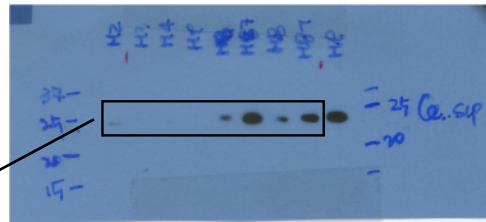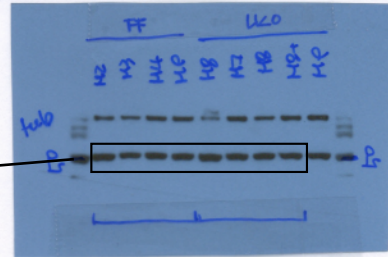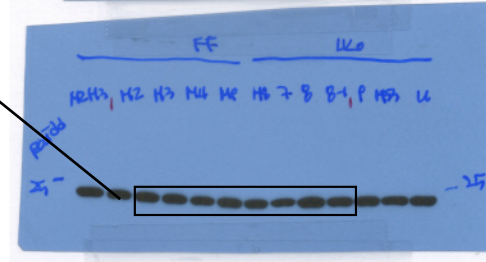

Fig 7B)

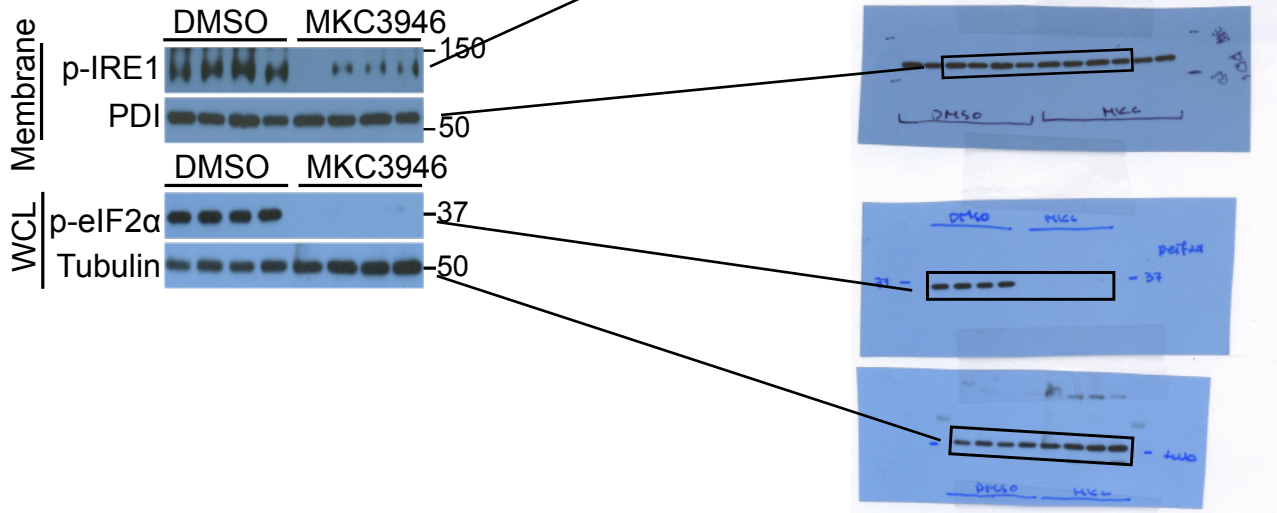

Fig 7C)

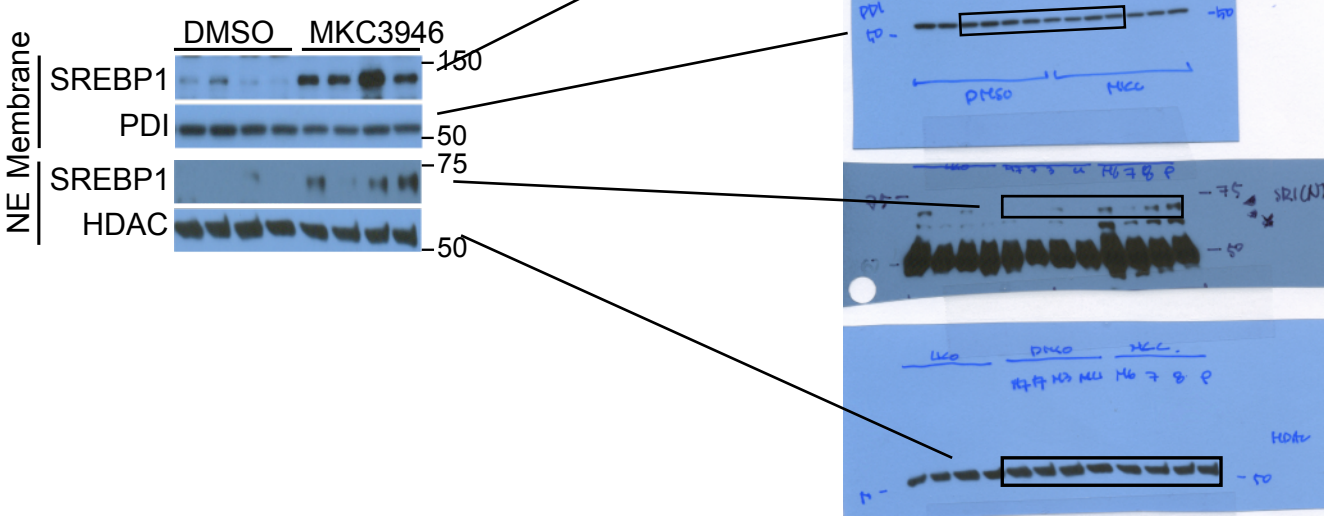

Sup, Fig 1D)

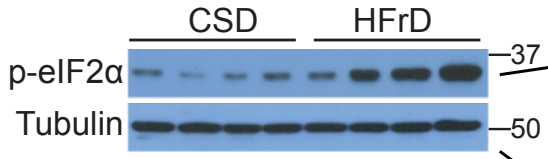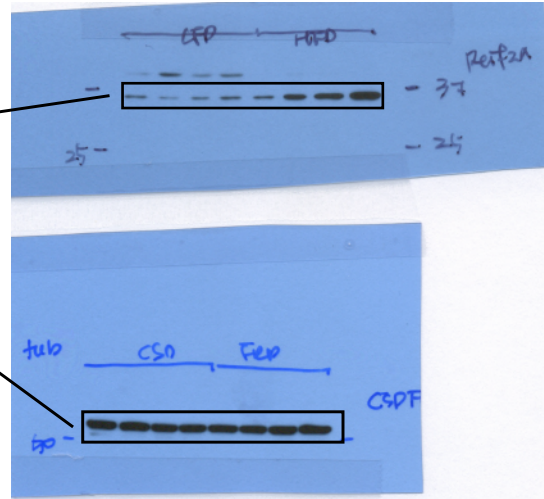

Sup Fig4 A)

| IP:HA      | Input | IG HA | IG HA | IG HA |
|------------|-------|-------|-------|-------|
| Casp2-HA   |       | +     |       | +     |
| PIDD1-Flag |       | +     |       | +     |
| RAIDD-6HIS |       | +     |       | +     |
| EV         | +     |       | +     |       |

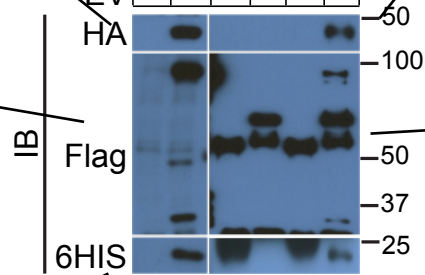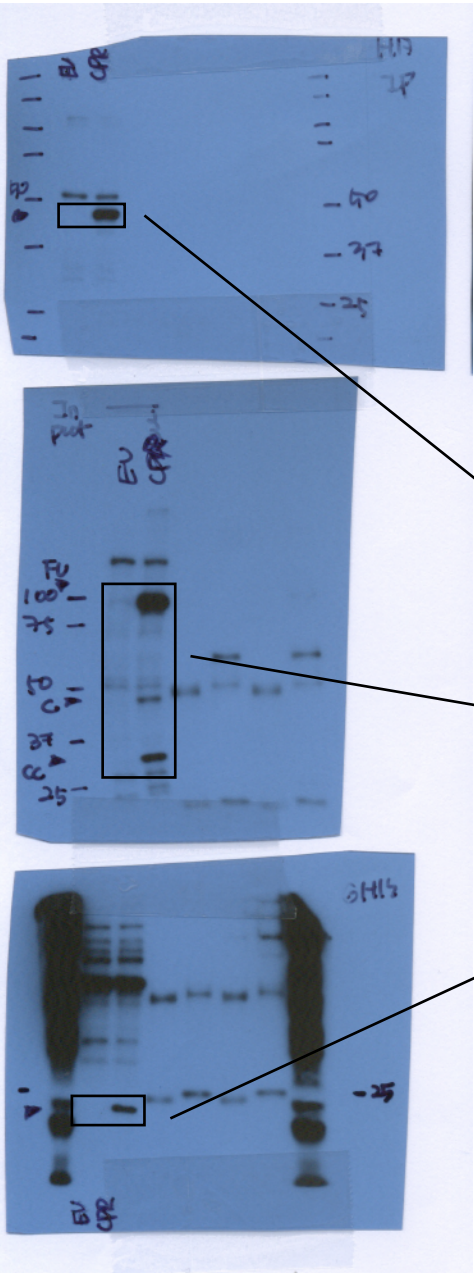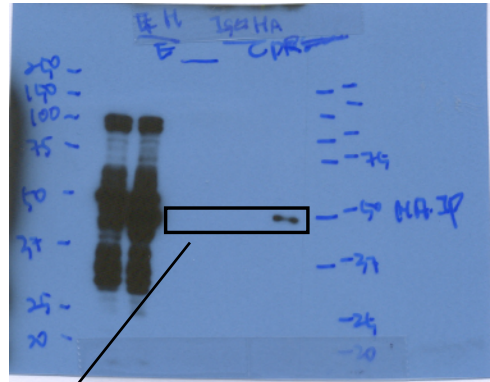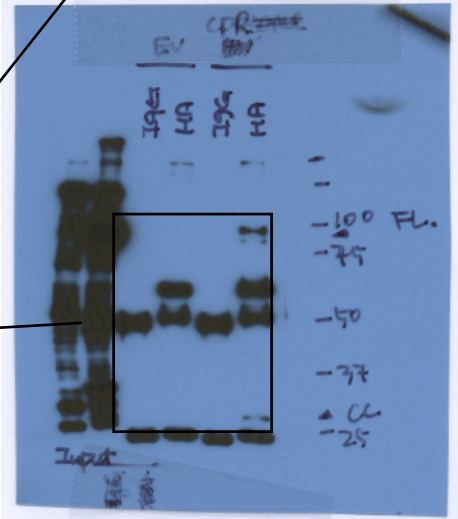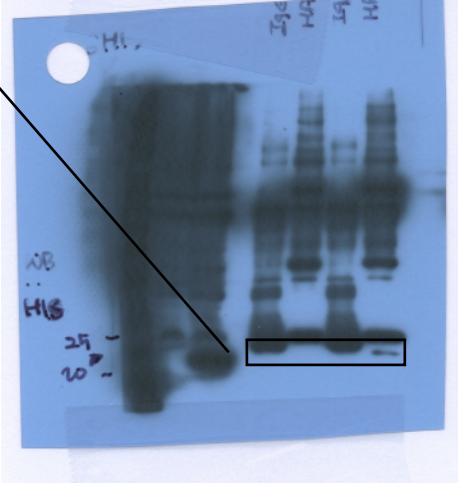

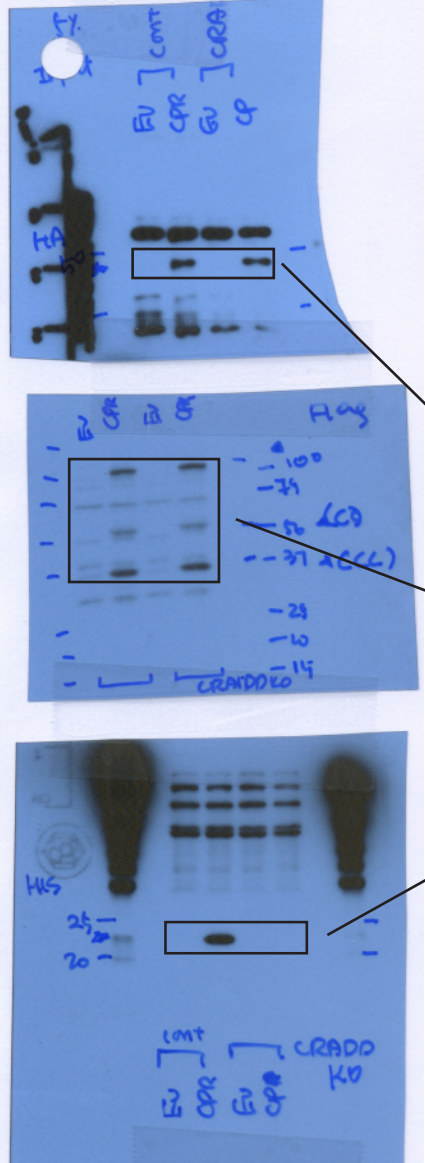

Sup Fig 4B)

| IP: HIS    | Input | IgG | HIS | IgG | HIS | IgG | HIS | IgG | HIS |
|------------|-------|-----|-----|-----|-----|-----|-----|-----|-----|
| Casp2-HA   | +     | +   |     | +   | +   |     | +   | +   | +   |
| PIDD1-Flag | +     | +   |     | +   | +   |     | +   | +   | +   |
| RAIDD-6HIS | +     |     | +   | +   |     | +   | +   |     | +   |
| EV         | +     | +   | +   | +   | +   | +   | +   | +   | +   |

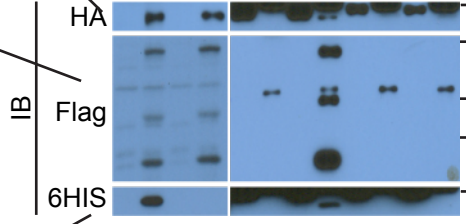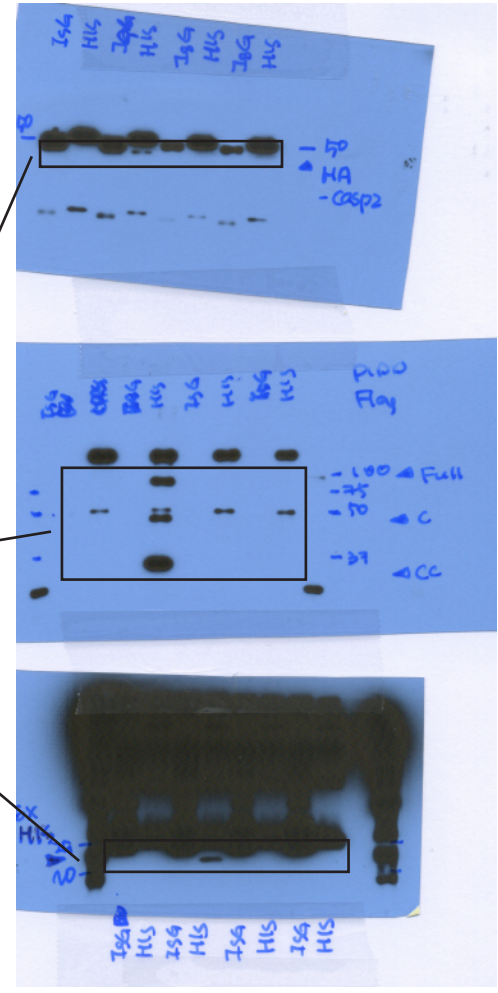





Sup Fig 4F)

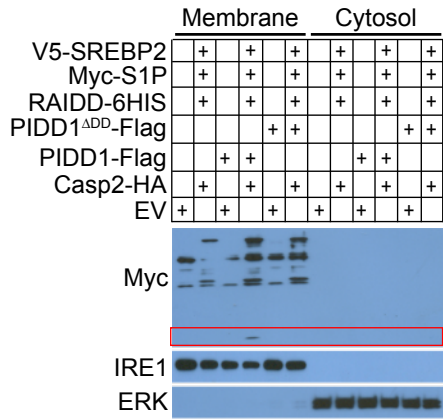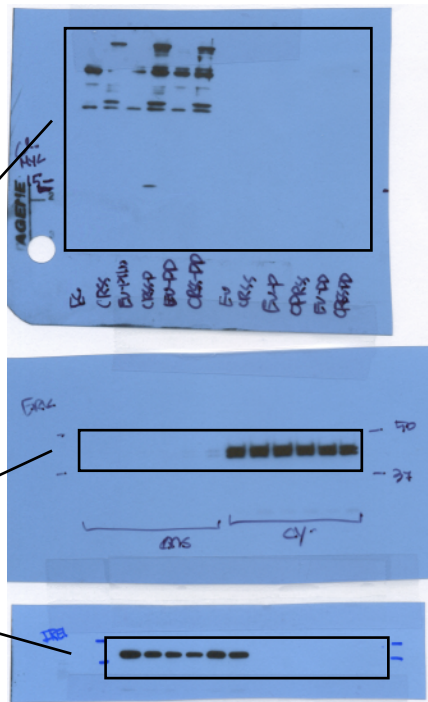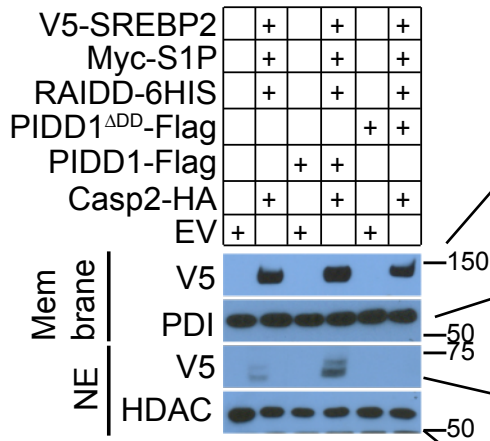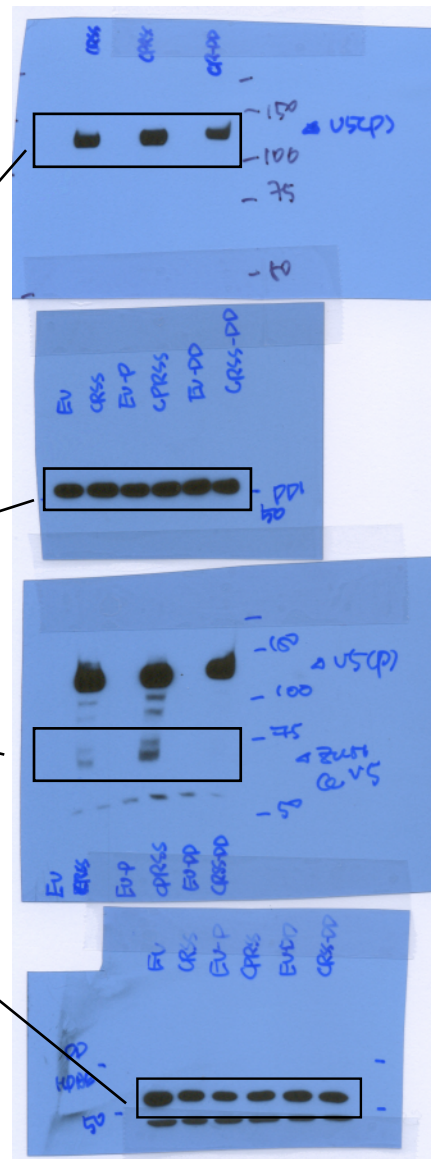

Sup Fig 5E)

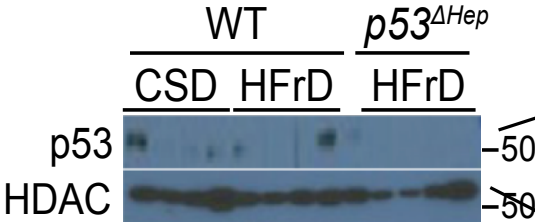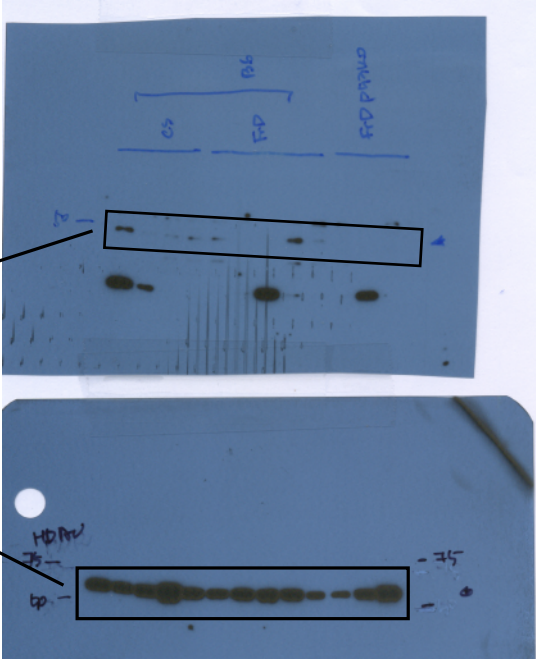

Sup Fig 6B)

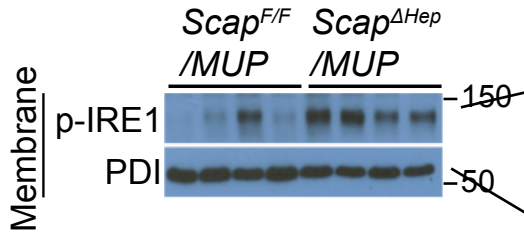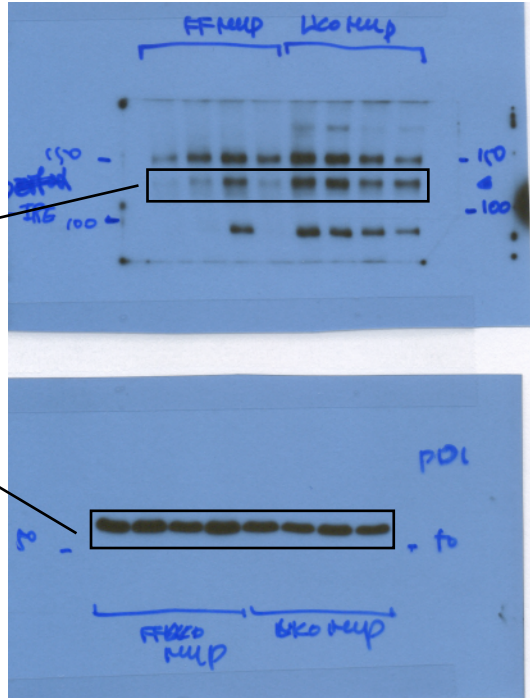

Sup Fig 6H)

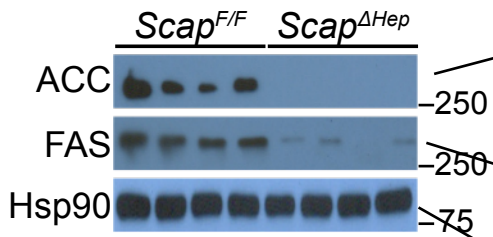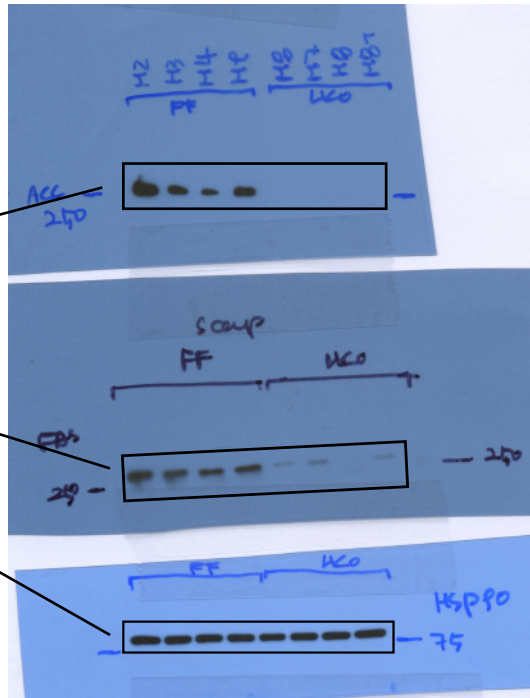

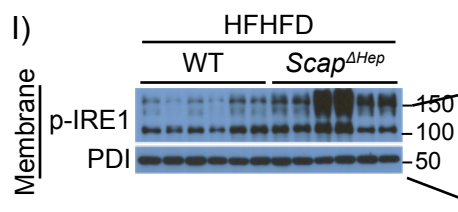

Sup Fig. 6I.

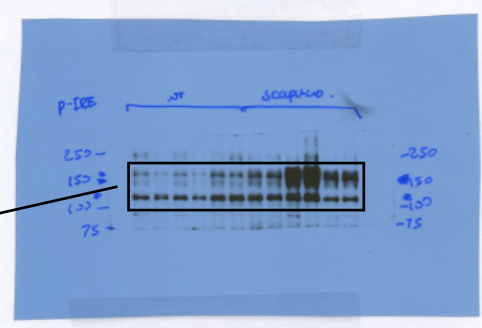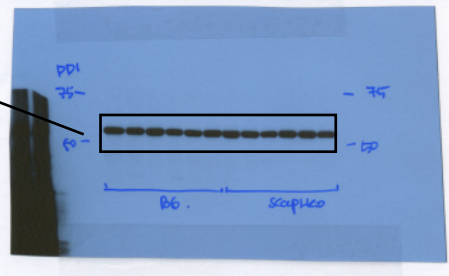

Sup Fig 7A)

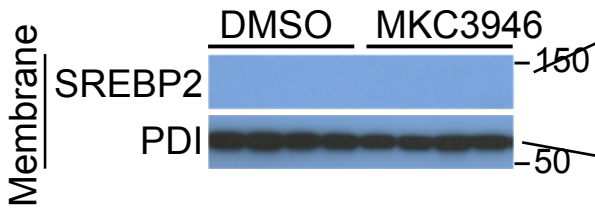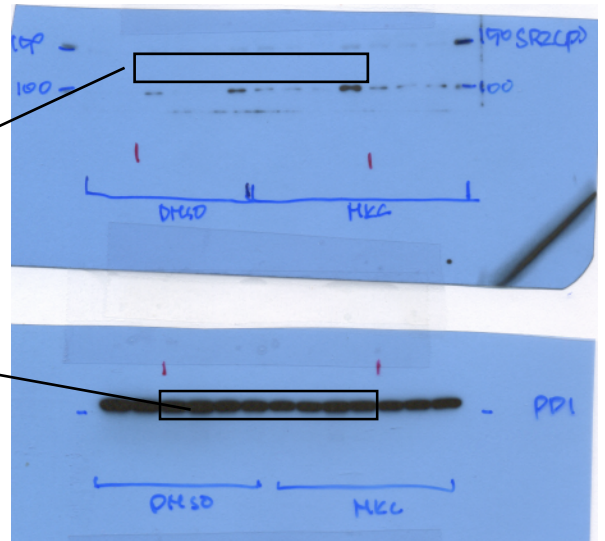

Supplement: NIHMS1833637-supplement-2.pdf [file NIHMS1833637-supplement-2.pdf]
